# Supplementary material for: Nanopore Assay Reveals Cell-Type-Dependent Gene Expression of Vesicular Stomatitis Indiana Virus and Differential Host Cell Response
Source: MDPI journal article supplement (doi:10.3390/pathogens10091196), 2021-09-15
Supplement: s1 [file s1]

| <b>Sequencing techniques</b>               | <b>Host cell reads</b> | <b>IVV reads</b> | <b>Average length of viral RNAs in bp</b> | <b>Average coverage of viral reads</b> |
|--------------------------------------------|------------------------|------------------|-------------------------------------------|----------------------------------------|
| MinION (ONT)_VSV_cap_mix                   | 6,302,618              | 559,408          | 1,004.27                                  | 50,335.6                               |
| MinION (ONT)<br>Glia_dcDNA_mix             | 29,888                 | 53,305           | 775.42                                    | 3,703.39                               |
| MinION (ONT)<br>Fibroblast_dcDNA_mix       | 80,344                 | 32,360           | 763.40                                    | 22,13.39                               |
| MinION (ONT)<br>Glia_amplified_cDNA        | 3,114,992              | 54,5547          | 781.81                                    | 4,251.85                               |
| MinION (ONT) Fibroblast_<br>amplified_cDNA | 5,872,662              | 494,827          | 709.90                                    | 3,067.90                               |

**Additional file 2: Table S1. Reads and read counts obtained by using different sequencing techniques**
